# Supplementary material for: Physisorption of benzene derivatives on graphene: critical roles of steric and stereoelectronic effects of the substituent
Source: Royal Society of Chemistry journal article supplement (doi:10.1039/c4cp05973e), 2015-01-01
Supplement: c4cp05973e1.pdf [file c4cp05973e1.pdf]

## **Physisorption of benzene derivatives on graphene: critical roles of steric and stereoelectronic effects of the substituent**

**Pan-Pan Zhou,<sup>a, b</sup> and Rui-Qin Zhang<sup>\*c</sup>**

<sup>a</sup> *Beijing Computational Science Research Center, Beijing, 100084, P. R. China*

<sup>b</sup> *Department of Chemistry, Lanzhou University, Lanzhou 730000, P. R. China*

<sup>c</sup> *Department of Physics and Materials Science, City University of Hong Kong, Hong Kong SAR, P. R. China; Fax: +852 3442 0538; Tel: +852 3442 7849; E-mail: [aprqz@cityu.edu.hk](mailto:aprqz@cityu.edu.hk)*

**Table S1** The minimal distance ( $d_m$ , Å) for the interaction between benzene derivative and the graphene surface at the three sites (H, B, O).

|           |          | a     | b     | c     | d     | e     | f     | g     |
|-----------|----------|-------|-------|-------|-------|-------|-------|-------|
| <b>1</b>  | <b>H</b> | 3.647 | 3.647 | 3.647 | 3.647 | 3.647 | 3.647 | 3.647 |
|           | <b>B</b> | 3.644 | 3.644 | 3.644 | 3.644 | 3.644 | 3.644 | 3.644 |
|           | <b>O</b> | 3.646 | 3.646 | 3.646 | 3.646 | 3.646 | 3.646 | 3.646 |
| <b>2</b>  | <b>H</b> | 3.604 | 3.615 | 3.634 | 3.611 | 3.629 | 3.593 | 3.631 |
|           | <b>B</b> | 3.538 | 3.615 | 3.626 | 3.607 | 3.633 | 3.606 | 3.620 |
|           | <b>O</b> | 3.599 | 3.614 | 3.629 | 3.615 | 3.597 | 3.591 | 3.623 |
| <b>3</b>  | <b>H</b> | 3.144 | 2.934 | 2.783 | 3.337 | 2.997 | 2.592 | 2.956 |
|           | <b>B</b> | 3.170 | 2.948 | 2.790 | 3.333 | 3.029 | 2.593 | 2.955 |
|           | <b>O</b> | 3.272 | 2.959 | 2.779 | 3.335 | 3.010 | 2.587 | 2.750 |
| <b>4</b>  | <b>H</b> | 2.624 | 3.039 | 2.901 | 2.718 | 3.066 | 2.816 | 3.056 |
|           | <b>B</b> | 2.621 | 3.017 | 2.905 | 2.624 | 3.066 | 2.821 | 3.057 |
|           | <b>O</b> | 2.618 | 3.045 | 2.904 | 2.618 | 3.062 | 2.815 | 3.052 |
| <b>5</b>  | <b>H</b> | 2.733 | 2.961 | 2.859 | 2.835 | 2.918 | 2.876 | 3.220 |
|           | <b>B</b> | 2.712 | 2.957 | 2.766 | 2.841 | 2.892 | 2.892 | 3.212 |
|           | <b>O</b> | 2.769 | 2.953 | 2.853 | 2.818 | 2.994 | 2.698 | 3.102 |
| <b>6</b>  | <b>H</b> | 3.395 | 3.175 | 3.437 | 3.658 | 3.145 | 3.436 | 3.510 |
|           | <b>B</b> | 3.317 | 3.168 | 3.135 | 3.542 | 3.104 | 3.082 | 3.442 |
|           | <b>O</b> | 3.307 | 3.128 | 3.331 | 3.466 | 3.071 | 3.202 | 3.260 |
| <b>7</b>  | <b>H</b> | 3.621 | 3.611 | 3.564 | 3.609 | 3.622 | 3.623 | 3.645 |
|           | <b>B</b> | 3.657 | 3.610 | 3.566 | 3.433 | 3.632 | 3.619 | 3.644 |
|           | <b>O</b> | 3.612 | 3.607 | 3.545 | 3.435 | 3.621 | 3.618 | 3.636 |
| <b>8</b>  | <b>H</b> | 3.503 | 2.777 | 3.544 | 3.574 | 2.776 | 3.542 | 2.864 |
|           | <b>B</b> | 3.338 | 2.862 | 3.538 | 3.562 | 2.845 | 3.399 | 2.822 |
|           | <b>O</b> | 3.498 | 2.810 | 3.546 | 3.558 | 2.796 | 3.334 | 2.836 |
| <b>9</b>  | <b>H</b> | 3.402 | 3.578 | 3.521 | 3.555 | 3.281 | 3.551 | 3.577 |
|           | <b>B</b> | 3.391 | 3.104 | 3.449 | 3.550 | 3.185 | 3.527 | 3.572 |
|           | <b>O</b> | 3.384 | 3.109 | 3.280 | 3.536 | 3.189 | 3.479 | 3.503 |
| <b>10</b> | <b>H</b> | 3.159 | 3.163 | 3.589 | 3.546 | 2.847 | 3.566 | 3.107 |
|           | <b>B</b> | 3.228 | 3.150 | 3.517 | 3.178 | 2.809 | 3.565 | 3.260 |
|           | <b>O</b> | 3.163 | 3.105 | 3.538 | 3.559 | 2.789 | 3.580 | 3.214 |
| <b>11</b> | <b>H</b> | 3.594 | 3.622 | 3.614 | 3.634 | 2.742 | 3.621 | 3.503 |
|           | <b>B</b> | 3.605 | 3.623 | 3.617 | 3.624 | 2.667 | 3.609 | 3.506 |
|           | <b>O</b> | 3.597 | 3.617 | 3.615 | 3.639 | 2.756 | 3.587 | 3.528 |
| <b>12</b> | <b>H</b> | 3.495 | 3.043 | 3.537 | 3.648 | 2.694 | 3.663 | 2.855 |
|           | <b>B</b> | 3.496 | 3.166 | 3.482 | 3.657 | 2.702 | 3.522 | 2.801 |
|           | <b>O</b> | 3.497 | 3.009 | 3.511 | 3.666 | 2.709 | 3.672 | 2.810 |
| <b>13</b> | <b>H</b> | 2.786 | 2.817 | 2.766 | 2.929 | 2.689 | 2.835 | 2.894 |
|           | <b>B</b> | 2.789 | 2.776 | 2.678 | 2.936 | 2.699 | 2.746 | 2.891 |
|           | <b>O</b> | 2.814 | 2.812 | 2.757 | 2.928 | 2.719 | 2.838 | 2.918 |

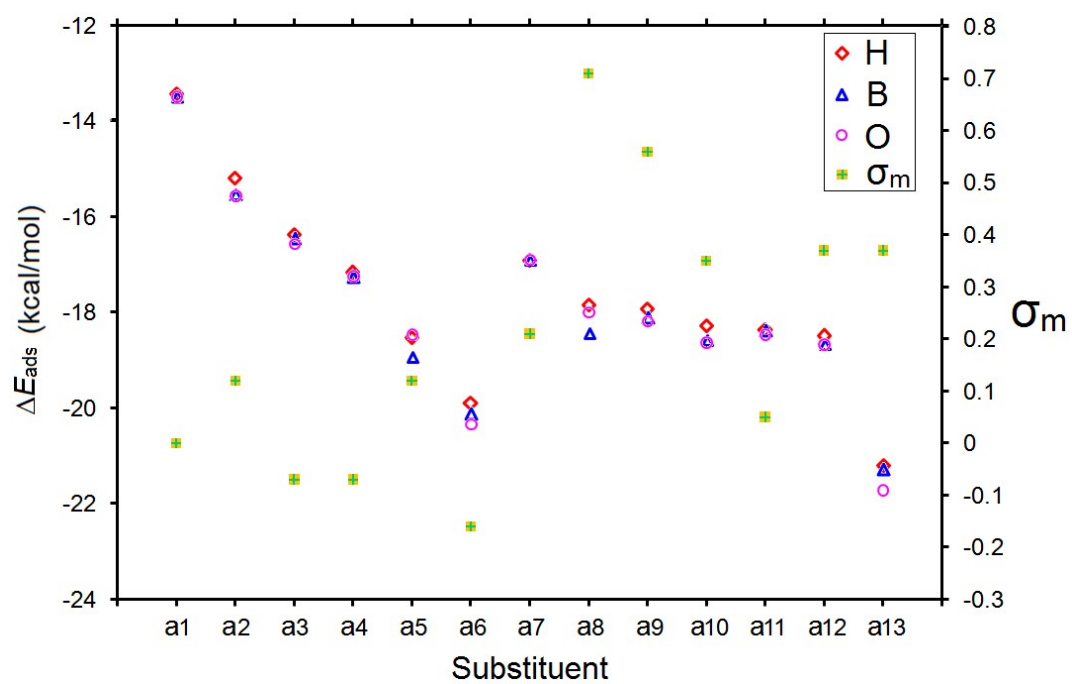

**Fig. S1** The relationship between the Hammett sigma *meta* constant ( $\sigma_m$ ) and the interaction energies.

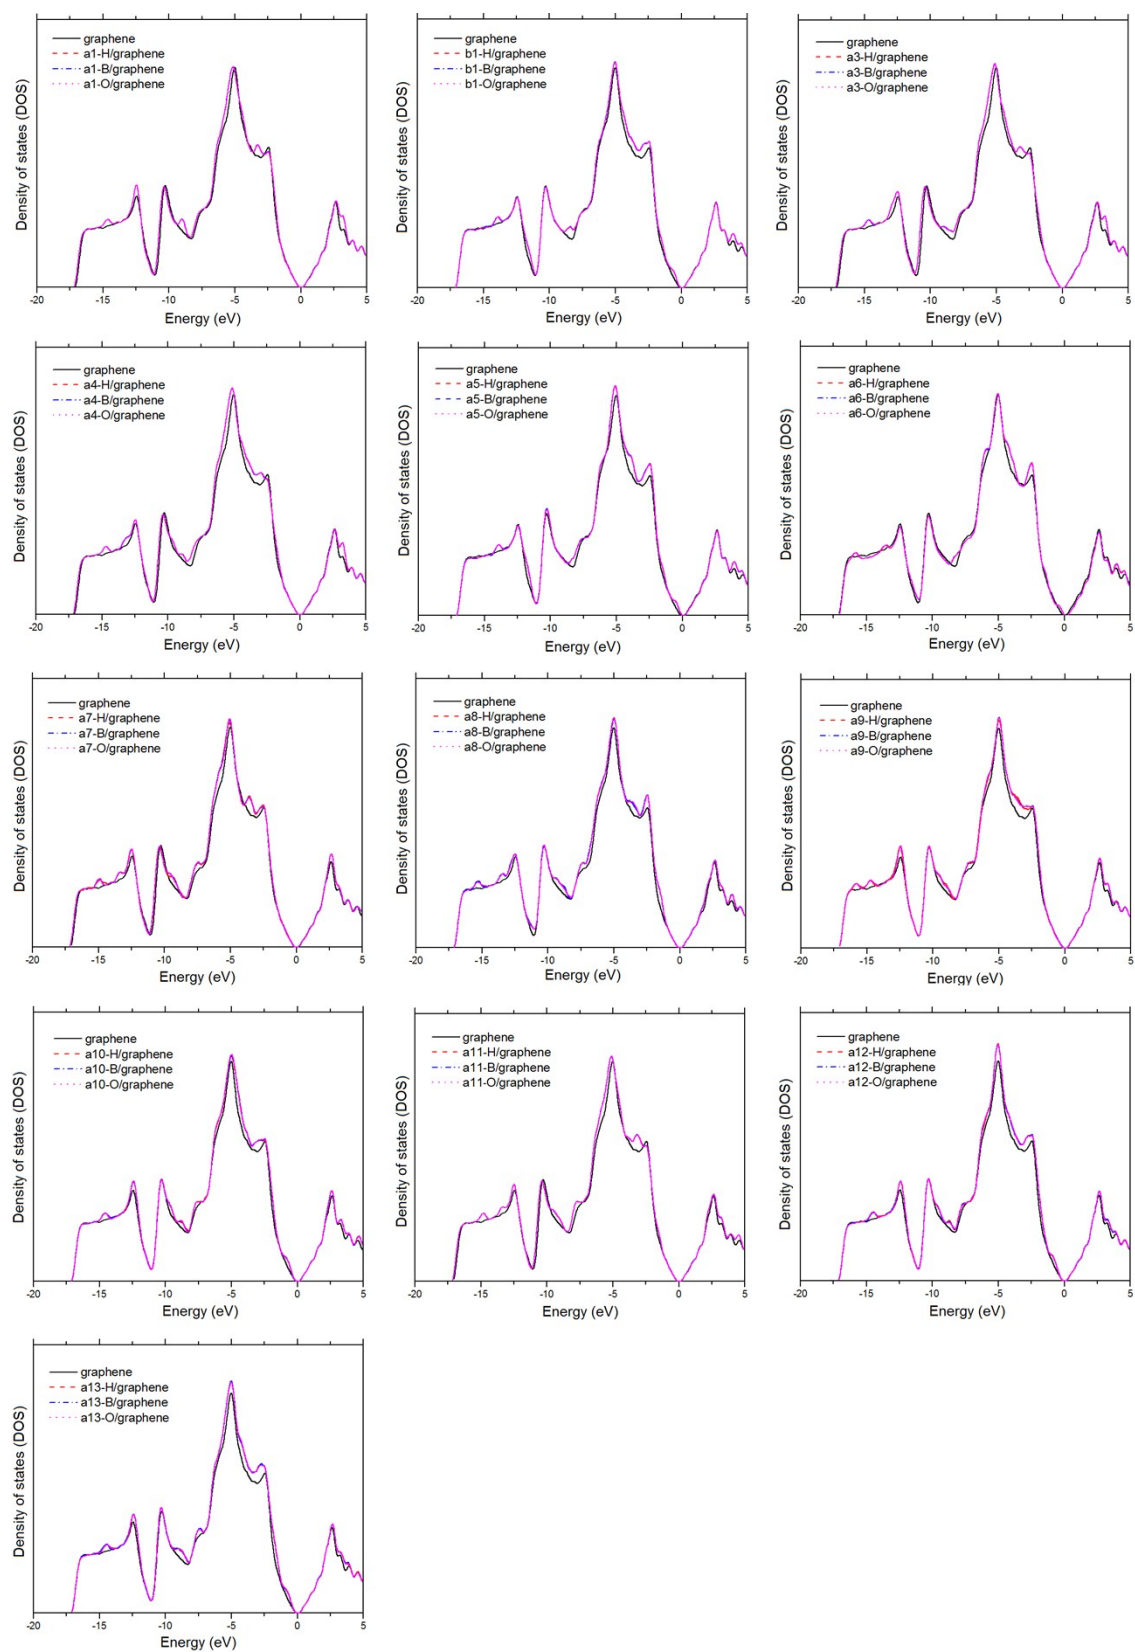

**Fig. S2** Total electronic DOSs for graphene and molecule/graphene systems with three different adsorption (H, B, O) sites. The Fermi level is set to zero.

**Table S2** The HOMO and LUMO orbital energies (in eV) for molecules (**a1-13**).

| Orbital | <b>a1</b> | <b>a2</b> | <b>a3</b> | <b>a4</b> | <b>a5</b> | <b>a6</b> | <b>a7</b> | <b>a8</b> | <b>a9</b> | <b>a10</b> | <b>a11</b> | <b>a12</b> | <b>a13</b> |
|---------|-----------|-----------|-----------|-----------|-----------|-----------|-----------|-----------|-----------|------------|------------|------------|------------|
| HOMO    | -8.37     | -7.67     | -8.02     | -8.00     | -7.53     | -6.79     | -7.94     | -9.26     | -8.90     | -8.81      | -7.63      | -8.75      | -8.65      |
| LUMO    | 0.52      | 0.35      | 0.54      | 0.50      | 0.51      | 0.41      | -0.30     | -1.67     | -0.80     | -1.05      | -0.38      | -0.72      | -0.57      |
